# Supplementary material
Source: MDPI journal article supplement (https://www.mdpi.com/2077-0472/11/6/545)
Supplement: s1 [file s1]

## Supplementary data

**Table S1.**

Firmness (N) of untreated (control) and 1-MCP treated 'Conference' pears analysis after storage in normal (NA) and controlled (CA) atmospheres at 2011 year

| Rootstock | Storage atmosphere | 1-MCP dose | Days of storage          |             |             |             |             |             |             |
|-----------|--------------------|------------|--------------------------|-------------|-------------|-------------|-------------|-------------|-------------|
|           |                    |            | 0                        | 30          | 60          | 90          | 120         | 150         | 180         |
| Q S1      | NA                 | Control    | 63.7 (1.57) <sup>a</sup> | 59.8 (2.16) | 53.9 (4.71) | 50.0 (6.67) | 50.0 (4.12) | 42.2 (3.53) | 40.2 (3.04) |
|           |                    | 1-MCP      | 63.7 (1.57)              | 64.7 (5.79) | 56.9 (3.73) | 54.9 (3.73) | 47.1 (5.00) | 40.2 (5.20) | 41.2 (4.02) |
|           | KA                 | Control    | 63.7 (1.57)              | 65.7 (3.73) | 64.7 (3.33) | 57.9 (3.73) | 55.9 (3.73) | 49.0 (5.20) | 45.1 (5.39) |
|           |                    | 1-MCP      | 63.7 (1.57)              | 62.8 (4.51) | 59.8 (4.51) | 60.8 (5.20) | 59.8 (6.47) | 55.9 (6.47) | 53.0 (6.47) |
| CP        | NA                 | Control    | 64.7 (4.41)              | 63.7 (3.43) | 57.9 (3.92) | 53.0 (4.90) | 49.0 (5.69) | 42.2 (5.10) | 42.2 (3.04) |
|           |                    | 1-MCP      | 64.7 (4.41)              | 62.8 (5.88) | 59.8 (5.88) | 53.9 (5.98) | 48.1 (4.81) | 43.1 (5.30) | 43.1 (5.30) |
|           | CA                 | Control    | 64.7 (4.41)              | 62.8 (6.47) | 61.8 (6.28) | 56.9 (6.18) | 53.9 (6.18) | 50.0 (6.18) | 46.1 (4.31) |
|           |                    | 1-MCP      | 64.7 (4.41)              | 62.8 (6.47) | 58.8 (5.98) | 61.8 (5.49) | 58.8 (6.18) | 54.9 (5.30) | 53.0 (3.04) |
| PD        | NA                 | Control    | 63.7 (1.47)              | 62.8 (5.20) | 56.9 (4.41) | 53.0 (3.92) | 53.9 (1.37) | 45.1 (6.37) | 39.2 (4.12) |
|           |                    | 1-MCP      | 63.7 (1.47)              | 62.8 (6.18) | 57.9 (7.35) | 52.0 (5.20) | 47.1 (4.71) | 46.1 (5.20) | 44.1 (5.39) |
|           | CA                 | Control    | 63.7 (1.47)              | 65.7 (3.92) | 60.8 (3.33) | 58.8 (3.33) | 54.9 (5.00) | 47.1 (5.00) | 45.1 (5.00) |
|           |                    | 1-MCP      | 63.7 (1.47)              | 65.7 (5.79) | 59.8 (5.39) | 59.8 (5.39) | 58.8 (5.10) | 54.9 (4.22) | 53.9 (3.82) |

### Main effects<sup>b</sup>

|                        |     |    |     |     |     |     |     |     |
|------------------------|-----|----|-----|-----|-----|-----|-----|-----|
| Rootstock (A)          | *** | ns | ns  | ns  | ns  | ns  | ns  | ns  |
| Storage atmosphere (B) | ns  | ns | *** | *** | *** | *** | *** | *** |
| 1-MCP dose (C)         | ns  | ns | ns  | **  | *** | *** | *** | *** |

### Interaction

|           |    |     |    |    |     |    |     |     |
|-----------|----|-----|----|----|-----|----|-----|-----|
| A x B     | ns | ns  | ** | ns | ns  | ns | ns  | ns  |
| A x C     | ns | ns  | ns | ns | ns  | ns | ns  | ns  |
| B x C     | ns | ns  | ** | ns | *** | ** | *** | *** |
| A x B x C | ns | *** | ns | ns | ns  | ns | ns  | ns  |

<sup>a</sup> Numbers in parentheses are the standard deviation of the mean (n = 10).

<sup>b</sup> P-value of F ratio: ns, not significantly different; \*P < 0.05; \*\*P < 0.01; \*\*\*P < 0.001.

**Table S2.**

Firmness (N) of untreated (control) and 1-MCP treated 'Conference' pears analysis after storage in normal (NA) and controlled (CA) atmospheres at 2012 year

| Rootstock                 | Storage atmosphere | 1-MCP dose | Days of storage          |             |             |             |             |             |             |
|---------------------------|--------------------|------------|--------------------------|-------------|-------------|-------------|-------------|-------------|-------------|
|                           |                    |            | 0                        | 30          | 60          | 90          | 120         | 150         | 180         |
| Q S1                      | NA                 | Control    | 59.8 (4.81) <sup>a</sup> | 56.9 (2.55) | 53.0 (2.55) | 50.0 (1.86) | 46.1 (2.55) | 43.1 (3.33) | 40.2 (3.24) |
|                           |                    | 1-MCP      | 59.8 (4.81)              | 58.8 (3.53) | 58.8 (2.65) | 55.9 (3.92) | 53.0 (2.75) | 49.0 (3.24) | 44.1 (3.33) |
|                           | KA                 | Control    | 63.7 (1.57)              | 59.8 (2.65) | 60.8 (5.20) | 57.9 (3.92) | 55.9 (4.41) | 52.0 (2.75) | 49.0 (4.71) |
|                           |                    | 1-MCP      | 59.8 (4.81)              | 60.8 (5.10) | 58.8 (3.33) | 58.8 (6.08) | 57.9 (5.49) | 56.9 (2.94) | 55.9 (4.71) |
| CP                        | NA                 | Control    | 59.8 (7.26)              | 56.9 (3.73) | 54.9 (1.77) | 52.0 (1.47) | 47.1 (3.14) | 44.1 (2.45) | 41.2 (4.41) |
|                           |                    | 1-MCP      | 59.8 (7.26)              | 59.8 (4.81) | 57.9 (2.35) | 56.9 (4.12) | 52.0 (4.51) | 48.1 (2.45) | 45.1 (3.14) |
|                           | CA                 | Control    | 64.7 (4.41)              | 59.8 (3.92) | 57.9 (4.02) | 57.9 (2.55) | 54.9 (4.31) | 53.9 (3.92) | 46.1 (3.82) |
|                           |                    | 1-MCP      | 59.8 (7.26)              | 60.8 (5.20) | 59.8 (3.14) | 57.9 (3.82) | 57.9 (5.59) | 55.9 (3.63) | 54.9 (4.81) |
| PD                        | NA                 | Control    | 61.8 (5.79)              | 54.9 (2.16) | 53.0 (1.96) | 49.0 (2.45) | 47.1 (2.94) | 43.1 (2.75) | 38.2 (4.02) |
|                           |                    | 1-MCP      | 61.8 (5.79)              | 58.8 (3.92) | 57.9 (2.75) | 55.9 (3.82) | 51.0 (4.12) | 46.1 (4.12) | 43.1 (3.82) |
|                           | CA                 | Control    | 63.7 (1.47)              | 60.8 (3.63) | 57.9 (2.75) | 55.9 (2.26) | 56.9 (3.63) | 53.0 (3.24) | 52.0 (3.92) |
|                           |                    | 1-MCP      | 61.8 (5.79)              | 59.8 (4.81) | 59.8 (3.73) | 57.9 (4.90) | 59.8 (6.37) | 57.9 (3.63) | 54.9 (3.33) |
| Main effects <sup>b</sup> |                    |            |                          |             |             |             |             |             |             |
| Rootstock (A)             |                    |            | ns                       | ns          | ns          | ns          | ns          | ns          | ns          |
| Storage atmosphere (B)    |                    |            | ns                       | ***         | ***         | ***         | ***         | ***         | ***         |
| 1-MCP dose (C)            |                    |            | ns                       | ns          | ***         | ***         | ***         | ***         | ***         |
| Interaction               |                    |            |                          |             |             |             |             |             |             |
| A x B                     |                    |            | ns                       | ns          | ns          | ns          | ns          | ns          | ***         |
| A x C                     |                    |            | ns                       | ns          | ns          | ns          | ns          | ns          | ns          |
| B x C                     |                    |            | ns                       | ns          | ***         | ***         | ns          | ns          | ns          |
| A x B x C                 |                    |            | ns                       | ns          | ns          | ns          | ns          | ns          | ns          |

<sup>a</sup> Numbers in parentheses are the standard deviation of the mean (n = 10).

<sup>b</sup> P-value of F ratio: ns, not significantly different; \*P < 0.05; \*\*P < 0.01; \*\*\*P < 0.001.

**Table S3.**

Firmness (N) of untreated (control) and 1-MCP treated 'Conference' pears analysis after storage in normal (NA) and controlled (CA) atmospheres at 2013 year

| Rootstock                 | Storage atmosphere | 1-MCP dose | Days of storage          |             |             |             |             |             |             |
|---------------------------|--------------------|------------|--------------------------|-------------|-------------|-------------|-------------|-------------|-------------|
|                           |                    |            | 0                        | 30          | 60          | 90          | 120         | 150         | 180         |
| Q S1                      | NA                 | Control    | 66.7 (3.82) <sup>a</sup> | 64.7 (4.81) | 63.7 (4.81) | 56.9 (3.43) | 51.0 (3.53) | 46.1 (3.04) | 41.2 (3.73) |
|                           |                    | 1-MCP      | 66.7 (3.82)              | 64.7 (3.82) | 64.7 (3.82) | 60.8 (4.71) | 56.9 (6.37) | 53.0 (6.86) | 49.0 (6.67) |
|                           | KA                 | Control    | 66.7 (3.82)              | 65.7 (2.84) | 63.7 (2.84) | 62.8 (2.84) | 57.9 (4.02) | 53.0 (3.82) | 51.0 (3.53) |
|                           |                    | 1-MCP      | 66.7 (3.82)              | 65.7 (3.53) | 64.7 (2.94) | 63.7 (2.65) | 61.8 (3.33) | 59.8 (4.31) | 57.9 (4.12) |
| CP                        | NA                 | Control    | 66.7 (3.43)              | 65.7 (5.30) | 63.7 (6.57) | 55.9 (6.77) | 50.0 (6.08) | 45.1 (4.61) | 39.2 (5.00) |
|                           |                    | 1-MCP      | 66.7 (3.43)              | 64.7 (3.53) | 63.7 (4.22) | 61.8 (3.53) | 55.9 (3.53) | 51.0 (4.51) | 48.1 (4.61) |
|                           | CA                 | Control    | 66.7 (3.43)              | 66.7 (3.43) | 63.7 (2.94) | 62.8 (2.94) | 58.8 (2.65) | 53.0 (3.73) | 49.0 (3.63) |
|                           |                    | 1-MCP      | 66.7 (3.43)              | 66.7 (3.53) | 63.7 (5.79) | 63.7 (5.79) | 61.8 (6.57) | 58.8 (5.69) | 55.9 (4.61) |
| PD                        | NA                 | Control    | 64.7 (4.51)              | 62.8 (4.22) | 60.8 (4.81) | 55.9 (4.31) | 49.0 (5.30) | 45.1 (5.00) | 39.2 (4.81) |
|                           |                    | 1-MCP      | 64.7 (4.51)              | 63.7 (4.90) | 63.7 (4.90) | 60.8 (4.90) | 54.9 (4.41) | 50.0 (4.90) | 46.1 (4.90) |
|                           | CA                 | Control    | 64.7 (4.51)              | 66.7 (4.22) | 62.8 (3.82) | 60.8 (2.75) | 56.9 (2.16) | 52.0 (2.75) | 49.0 (5.00) |
|                           |                    | 1-MCP      | 64.7 (4.51)              | 66.7 (5.69) | 64.7 (3.82) | 62.8 (4.22) | 60.8 (5.30) | 56.9 (5.69) | 53.9 (4.71) |
| Main effects <sup>b</sup> |                    |            |                          |             |             |             |             |             |             |
| Rootstock (A)             |                    |            | *                        | ns          | ns          | ns          | ns          | ns          | *           |
| Storage atmosphere (B)    |                    |            | ns                       | *           | ns          | ***         | ***         | ***         | ***         |
| 1-MCP dose (C)            |                    |            | ns                       | ns          | ns          | ***         | ***         | ***         | ***         |
| Interaction               |                    |            |                          |             |             |             |             |             |             |
| A x B                     |                    |            | ns                       | ns          | ns          | ns          | ns          | ns          | ns          |
| A x C                     |                    |            | ns                       | ns          | ns          | ns          | ns          | ns          | ns          |
| B x C                     |                    |            | ns                       | ns          | ns          | *           | ns          | ns          | ns          |
| A x B x C                 |                    |            | ns                       | ns          | ns          | ns          | ns          | ns          | ns          |

<sup>a</sup> Numbers in parentheses are the standard deviation of the mean (n = 10).

<sup>b</sup> P-value of F ratio: ns, not significantly different; \*P < 0.05; \*\*P < 0.01; \*\*\*P < 0.001.

**Table S4.**

Soluble solid content (%) of untreated (control) and 1-MCP treated 'Conference' pears analysis after storage in normal (NA) and controlled (CA) atmospheres at 2011 year

| Rootstock                 | Storage atmosphere | 1-MCP dose | Days of storage)         |             |             |             |             |             |             |
|---------------------------|--------------------|------------|--------------------------|-------------|-------------|-------------|-------------|-------------|-------------|
|                           |                    |            | 0                        | 30          | 60          | 90          | 120         | 150         | 180         |
| Q S1                      | NA                 | Control    | 12.1 (0.78) <sup>a</sup> | 12.3 (0.54) | 12.7 (0.66) | 13.3 (1.24) | 13.8 (0.76) | 14.0 (0.66) | 13.9 (0.47) |
|                           |                    | 1-MCP      | 12.1 (0.78)              | 12.5 (0.49) | 12.5 (0.49) | 13.6 (0.88) | 14.2 (0.79) | 14.5 (1.15) | 14.6 (1.17) |
|                           | KA                 | Control    | 11.7 (0.85)              | 12.0 (0.73) | 12.4 (0.82) | 12.8 (0.57) | 13.9 (0.90) | 14.5 (0.95) | 14.7 (0.85) |
|                           |                    | 1-MCP      | 11.7 (0.85)              | 12.2 (0.74) | 12.1 (0.83) | 13.1 (0.88) | 13.5 (0.55) | 13.9 (0.66) | 14.3 (0.50) |
| CP                        | NA                 | Control    | 12.9 (1.93)              | 13.3 (0.96) | 13.2 (0.88) | 15.7 (0.87) | 15.7 (0.86) | 15.1 (0.42) | 14.3 (0.97) |
|                           |                    | 1-MCP      | 12.9 (1.93)              | 12.9 (1.47) | 13.1 (1.27) | 12.9 (1.15) | 14.1 (0.93) | 14.2 (1.06) | 15.1 (1.22) |
|                           | CA                 | Control    | 12.9 (1.93)              | 12.7 (1.04) | 12.6 (0.90) | 13.0 (0.92) | 14.0 (0.88) | 14.3 (0.93) | 15.1 (0.65) |
|                           |                    | 1-MCP      | 12.9 (1.93)              | 13.0 (0.74) | 12.9 (0.73) | 13.0 (0.47) | 13.7 (0.52) | 13.8 (0.65) | 14.6 (0.77) |
| PD                        | NA                 | Control    | 12.9 (0.90)              | 13.1 (0.69) | 13.9 (0.64) | 14.9 (0.58) | 15.0 (0.81) | 14.7 (1.05) | 14.2 (0.81) |
|                           |                    | 1-MCP      | 12.9 (0.90)              | 12.9 (0.86) | 13.0 (0.65) | 13.7 (1.09) | 14.5 (0.89) | 14.7 (1.00) | 14.4 (0.98) |
|                           | CA                 | Control    | 13.7 (1.33)              | 12.9 (0.89) | 13.0 (0.83) | 13.5 (0.69) | 14.4 (0.92) | 14.7 (0.91) | 14.6 (0.81) |
|                           |                    | 1-MCP      | 13.7 (1.33)              | 13.1 (0.87) | 12.8 (0.73) | 13.3 (0.79) | 13.5 (0.50) | 14.1 (0.76) | 14.4 (0.84) |
| Main effects <sup>b</sup> |                    |            |                          |             |             |             |             |             |             |
| Rootstock (A)             |                    |            | ***                      | ***         | ***         | **          | **          | ns          | ns          |
| Storage atmosphere (B)    |                    |            | ns                       | ns          | **          | ***         | ***         | *           | ns          |
| 1-MCP dose (C)            |                    |            | ns                       | ns          | ns          | ***         | ***         | *           | ns          |
| Interaction               |                    |            |                          |             |             |             |             |             |             |
| A x B                     |                    |            | ns                       | ns          | ns          | ns          | ns          | ns          | ns          |
| A x C                     |                    |            | ns                       | ns          | ns          | ***         | *           | ns          | ns          |
| B x C                     |                    |            | ns                       | ns          | ns          | ***         | ns          | ns          | **          |
| A x B x C                 |                    |            | ns                       | ns          | ns          | **          | **          | ns          | ns          |

<sup>a</sup> Numbers in parentheses are the standard deviation of the mean (n = 10).

<sup>b</sup> P-value of F ratio: ns, not significantly different; \*P < 0.05; \*\*P < 0.01; \*\*\*P < 0.001.

**Table S5.**

Soluble solid content (%) of untreated (control) and 1-MCP treated 'Conference' pears analysis after storage in normal (NA) and controlled (CA) atmospheres at 2012 year

| Rootstock                 | Storage atmosphere | 1-MCP dose | Days of storage |             |             |             |             |             |             |
|---------------------------|--------------------|------------|-----------------|-------------|-------------|-------------|-------------|-------------|-------------|
|                           |                    |            | 0               | 30          | 60          | 90          | 120         | 150         | 180         |
| Q S1                      | NA                 | Control    | 12.0 (0.67)     | 12.2 (0.51) | 12.4 (0.47) | 13.2 (0.87) | 13.8 (0.76) | 14.2 (0.79) | 14.1 (0.60) |
|                           |                    | 1-MCP      | 12.0 (0.67)     | 12.5 (0.55) | 12.7 (0.59) | 13.0 (0.67) | 13.1 (0.68) | 13.6 (0.86) | 14.2 (1.04) |
|                           | KA                 | Control    | 12.0 (0.67)     | 12.1 (0.54) | 12.4 (0.63) | 12.6 (0.70) | 12.9 (0.72) | 13.2 (0.84) | 14.0 (0.95) |
|                           |                    | 1-MCP      | 12.0 (0.67)     | 12.1 (0.92) | 12.2 (0.80) | 12.9 (0.60) | 12.8 (0.71) | 13.5 (0.86) | 13.9 (0.91) |
| CP                        | NA                 | Control    | 12.4 (0.64)     | 13.0 (0.77) | 13.9 (1.00) | 13.1 (0.68) | 13.4 (0.80) | 14.1 (0.77) | 13.7 (0.58) |
|                           |                    | 1-MCP      | 12.4 (0.64)     | 12.5 (0.57) | 12.6 (0.54) | 13.1 (0.82) | 13.5 (0.90) | 13.9 (0.92) | 14.3 (0.74) |
|                           | CA                 | Control    | 12.4 (0.64)     | 12.2 (0.61) | 12.7 (0.68) | 12.7 (0.75) | 13.2 (0.74) | 13.7 (0.80) | 14.1 (0.75) |
|                           |                    | 1-MCP      | 12.4 (0.64)     | 12.3 (0.65) | 12.3 (0.65) | 12.4 (0.80) | 12.6 (0.82) | 13.3 (0.83) | 14.0 (0.71) |
| PD                        | NA                 | Control    | 12.2 (0.84)     | 12.7 (0.79) | 13.1 (0.80) | 13.8 (0.46) | 14.5 (0.76) | 14.3 (0.82) | 13.9 (0.70) |
|                           |                    | 1-MCP      | 12.2 (0.84)     | 12.3 (0.72) | 12.3 (0.72) | 13.0 (0.59) | 13.7 (0.75) | 14.2 (0.77) | 14.3 (0.81) |
|                           | CA                 | Control    | 12.2 (0.84)     | 12.4 (0.74) | 12.5 (0.65) | 13.0 (0.69) | 13.6 (0.98) | 14.0 (1.26) | 14.6 (1.15) |
|                           |                    | 1-MCP      | 12.2 (0.84)     | 12.3 (0.74) | 12.5 (0.74) | 12.9 (0.65) | 13.3 (0.58) | 13.7 (0.71) | 14.1 (0.93) |
| Main effects <sup>b</sup> |                    |            |                 |             |             |             |             |             |             |
| Rootstock (A)             |                    |            | ns              | ns          | *           | ns          | ***         | ns          | ns          |
| Storage atmosphere (B)    |                    |            | ns              | *           | **          | ***         | ***         | **          | ns          |
| 1-MCP dose (C)            |                    |            | ns              | ns          | **          | ns          | **          | ns          | ns          |
| Interaction               |                    |            |                 |             |             |             |             |             |             |
| A x B                     |                    |            | ns              | ns          | ns          | ns          | ns          | ns          | ns          |
| A x C                     |                    |            | ns              | ns          | *           | ns          | ns          | ns          | ns          |
| B x C                     |                    |            | ns              | ns          | ns          | ns          | ns          | ns          | ns          |
| A x B x C                 |                    |            | ns              | ns          | *           | ns          | ns          | ns          | ns          |

<sup>a</sup> Numbers in parentheses are the standard deviation of the mean (n = 10).

<sup>b</sup> P-value of F ratio: ns, not significantly different; \*P < 0.05; \*\*P < 0.01; \*\*\*P < 0.001.

**Table S6.**

Soluble solid content (%) of untreated (control) and 1-MCP treated 'Conference' pears analysis after storage in normal (NA) and controlled (CA) atmospheres at 2013 year

| Rootstock                 | Storage atmosphere | 1-MCP dose | Days of storage |             |             |             |             |             |             |
|---------------------------|--------------------|------------|-----------------|-------------|-------------|-------------|-------------|-------------|-------------|
|                           |                    |            | 0               | 30          | 60          | 90          | 120         | 150         | 180         |
| Q S1                      | NA                 | Control    | 12.4 (0.70)     | 12.7 (0.48) | 12.9 (0.64) | 13.5 (0.85) | 14.3 (1.00) | 14.9 (0.91) | 14.2 (0.73) |
|                           |                    | 1-MCP      | 12.4 (0.70)     | 12.5 (0.78) | 12.7 (0.83) | 13.1 (0.73) | 13.3 (0.76) | 13.9 (0.76) | 14.4 (0.84) |
|                           | KA                 | Control    | 12.4 (0.70)     | 12.6 (0.66) | 12.5 (0.54) | 12.7 (0.62) | 13.7 (1.06) | 14.8 (0.73) | 15.3 (0.90) |
|                           |                    | 1-MCP      | 12.4 (0.70)     | 12.2 (0.68) | 12.2 (0.68) | 12.5 (0.83) | 12.8 (0.77) | 13.4 (0.88) | 14.1 (0.87) |
| CP                        | NA                 | Control    | 11.9 (0.60)     | 12.5 (0.62) | 12.7 (0.62) | 13.4 (0.74) | 13.9 (0.72) | 15.0 (0.57) | 13.9 (0.54) |
|                           |                    | 1-MCP      | 11.9 (0.60)     | 12.2 (0.55) | 12.3 (0.73) | 12.5 (0.67) | 12.9 (0.72) | 14.1 (0.62) | 14.6 (0.64) |
|                           | CA                 | Control    | 11.9 (0.60)     | 12.2 (0.55) | 12.3 (0.43) | 12.7 (0.70) | 13.5 (1.10) | 14.4 (1.11) | 14.9 (0.73) |
|                           |                    | 1-MCP      | 11.9 (0.60)     | 12.3 (0.78) | 12.4 (0.77) | 12.3 (0.86) | 12.9 (1.07) | 13.8 (0.83) | 14.4 (0.78) |
| PD                        | NA                 | Control    | 12.1 (0.74)     | 12.2 (0.67) | 12.6 (0.64) | 13.8 (1.04) | 14.2 (0.92) | 14.6 (0.77) | 14.5 (0.63) |
|                           |                    | 1-MCP      | 12.1 (0.74)     | 12.4 (0.72) | 12.3 (0.82) | 12.9 (1.00) | 13.3 (1.06) | 14.2 (0.69) | 15.0 (0.66) |
|                           | CA                 | Control    | 12.1 (0.74)     | 12.2 (0.69) | 12.3 (0.63) | 12.3 (0.63) | 14.1 (1.07) | 14.9 (0.91) | 15.2 (0.62) |
|                           |                    | 1-MCP      | 12.1 (0.74)     | 12.1 (0.56) | 12.5 (0.87) | 12.6 (0.97) | 13.5 (1.26) | 14.0 (1.18) | 14.6 (0.79) |
| Main effects <sup>b</sup> |                    |            |                 |             |             |             |             |             |             |
| Rootstock (A)             |                    |            | **              | ns          | ns          | ns          | ns          | ns          | ns          |
| Storage atmosphere (B)    |                    |            | ns              | ns          | ns          | ***         | ns          | ns          | *           |
| 1-MCP dose (C)            |                    |            | ns              | ns          | ns          | **          | ***         | ***         | ns          |
| Interaction               |                    |            |                 |             |             |             |             |             |             |
| A x B                     |                    |            | ns              | ns          | ns          | ns          | ns          | ns          | ns          |
| A x C                     |                    |            | ns              | ns          | ns          | ns          | ns          | ns          | ns          |
| B x C                     |                    |            | ns              | ns          | ns          | *           | ns          | ns          | ns          |
| A x B x C                 |                    |            | ns              | ns          | ns          | ns          | ns          | ns          | ns          |

<sup>a</sup> Numbers in parentheses are the standard deviation of the mean (n = 10).

<sup>b</sup> P-value of F ratio: ns, not significantly different; \*P < 0.05; \*\*P < 0.01; \*\*\*P < 0.001.

**Table S7.**

Acidity of untreated (control) and 1-MCP treated 'Conference' pears analysis after storage in normal (NA) and controlled (CA) atmospheres at 2011 year

| Rootstock                 | Storage atmosphere | 1-MCP dose | Days of storage |             |             |             |             |             |             |
|---------------------------|--------------------|------------|-----------------|-------------|-------------|-------------|-------------|-------------|-------------|
|                           |                    |            | 0               | 30          | 60          | 90          | 120         | 150         | 180         |
| Q S1                      | NA                 | Control    | 0.21 (0.03)     | 0.18 (0.02) | 0.16 (0.02) | 0.09 (0.01) | 0.11 (0.02) | 0.09 (0.01) | 0.05 (0.01) |
|                           |                    | 1-MCP      | 0.21 (0.03)     | 0.20 (0.03) | 0.20 (0.02) | 0.16 (0.02) | 0.17 (0.02) | 0.14 (0.02) | 0.11 (0.02) |
|                           | KA                 | Control    | 0.21 (0.03)     | 0.18 (0.02) | 0.19 (0.02) | 0.17 (0.02) | 0.14 (0.02) | 0.15 (0.02) | 0.13 (0.03) |
|                           |                    | 1-MCP      | 0.21 (0.03)     | 0.21 (0.03) | 0.20 (0.02) | 0.19 (0.02) | 0.16 (0.02) | 0.17 (0.01) | 0.16 (0.01) |
| CP                        | NA                 | Control    | 0.19 (0.02)     | 0.18 (0.02) | 0.14 (0.02) | 0.11 (0.01) | 0.10 (0.01) | 0.10 (0.01) | 0.06 (0.01) |
|                           |                    | 1-MCP      | 0.19 (0.02)     | 0.18 (0.02) | 0.17 (0.02) | 0.15 (0.02) | 0.16 (0.02) | 0.15 (0.02) | 0.10 (0.02) |
|                           | CA                 | Control    | 0.19 (0.02)     | 0.19 (0.02) | 0.19 (0.02) | 0.18 (0.02) | 0.15 (0.02) | 0.16 (0.02) | 0.12 (0.03) |
|                           |                    | 1-MCP      | 0.19 (0.02)     | 0.22 (0.02) | 0.19 (0.02) | 0.19 (0.02) | 0.16 (0.03) | 0.16 (0.02) | 0.16 (0.02) |
| PD                        | NA                 | Control    | 0.20 (0.02)     | 0.17 (0.02) | 0.15 (0.02) | 0.13 (0.01) | 0.14 (0.01) | 0.10 (0.01) | 0.05 (0.01) |
|                           |                    | 1-MCP      | 0.20 (0.02)     | 0.19 (0.01) | 0.19 (0.01) | 0.16 (0.02) | 0.14 (0.01) | 0.15 (0.02) | 0.11 (0.03) |
|                           | CA                 | Control    | 0.20 (0.02)     | 0.19 (0.02) | 0.20 (0.02) | 0.18 (0.02) | 0.16 (0.02) | 0.15 (0.02) | 0.13 (0.02) |
|                           |                    | 1-MCP      | 0.20 (0.02)     | 0.21 (0.02) | 0.20 (0.02) | 0.18 (0.02) | 0.17 (0.01) | 0.17 (0.01) | 0.16 (0.01) |
| Main effects <sup>b</sup> |                    |            |                 |             |             |             |             |             |             |
| Rootstock (A)             |                    |            | ***             | ns          | *           | ns          | **          | ns          | ns          |
| Storage atmosphere (B)    |                    |            | ns              | ***         | ***         | ***         | ***         | ***         | ***         |
| 1-MCP dose (C)            |                    |            | ns              | ***         | ***         | ***         | ***         | ***         | ***         |
| Interaction               |                    |            |                 |             |             |             |             |             |             |
| A x B                     |                    |            | ns              | ns          | *           | *           | ns          | ns          | ns          |
| A x C                     |                    |            | ns              | ns          | ns          | **          | ***         | ns          | ns          |
| B x C                     |                    |            | ns              | *           | ***         | ***         | ***         | ***         | *           |
| A x B x C                 |                    |            | ns              | ns          | ns          | ns          | ***         | ns          | ns          |

<sup>a</sup> Numbers in parentheses are the standard deviation of the mean (n = 10).

<sup>b</sup> P-value of F ratio: ns, not significantly different; \*P < 0.05; \*\*P < 0.01; \*\*\*P < 0.001.

**Table S8.**

Acidity of untreated (control) and 1-MCP treated 'Conference' pears analysis after storage in normal (NA) and controlled (CA) atmospheres at 2012 year

| Rootstock                 | Storage atmosphere | 1-MCP dose | Days of storage |             |             |             |             |             |             |
|---------------------------|--------------------|------------|-----------------|-------------|-------------|-------------|-------------|-------------|-------------|
|                           |                    |            | 0               | 30          | 60          | 90          | 120         | 150         | 180         |
| Q S1                      | NA                 | Control    | 0.21 (0.01)     | 0.20 (0.01) | 0.18 (0.01) | 0.16 (0.01) | 0.16 (0.01) | 0.13 (0.01) | 0.08 (0.01) |
|                           |                    | 1-MCP      | 0.21 (0.01)     | 0.18 (0.02) | 0.18 (0.02) | 0.18 (0.02) | 0.18 (0.01) | 0.12 (0.02) | 0.12 (0.02) |
|                           | KA                 | Control    | 0.21 (0.01)     | 0.20 (0.02) | 0.20 (0.02) | 0.18 (0.01) | 0.17 (0.01) | 0.15 (0.02) | 0.14 (0.02) |
|                           |                    | 1-MCP      | 0.21 (0.01)     | 0.21 (0.02) | 0.20 (0.02) | 0.20 (0.02) | 0.18 (0.02) | 0.19 (0.02) | 0.17 (0.02) |
| CP                        | NA                 | Control    | 0.20 (0.01)     | 0.21 (0.02) | 0.19 (0.01) | 0.18 (0.01) | 0.16 (0.02) | 0.09 (0.01) | 0.06 (0.01) |
|                           |                    | 1-MCP      | 0.20 (0.01)     | 0.19 (0.02) | 0.19 (0.02) | 0.18 (0.01) | 0.17 (0.01) | 0.11 (0.02) | 0.11 (0.02) |
|                           | CA                 | Control    | 0.20 (0.01)     | 0.20 (0.02) | 0.19 (0.02) | 0.18 (0.01) | 0.18 (0.01) | 0.14 (0.02) | 0.14 (0.02) |
|                           |                    | 1-MCP      | 0.20 (0.01)     | 0.21 (0.01) | 0.20 (0.01) | 0.19 (0.01) | 0.17 (0.02) | 0.18 (0.02) | 0.18 (0.02) |
| PD                        | NA                 | Control    | 0.21 (0.01)     | 0.19 (0.02) | 0.19 (0.02) | 0.17 (0.02) | 0.14 (0.01) | 0.10 (0.01) | 0.07 (0.01) |
|                           |                    | 1-MCP      | 0.21 (0.01)     | 0.19 (0.02) | 0.18 (0.01) | 0.18 (0.01) | 0.17 (0.01) | 0.11 (0.02) | 0.10 (0.02) |
|                           | CA                 | Control    | 0.21 (0.01)     | 0.20 (0.02) | 0.19 (0.02) | 0.19 (0.02) | 0.17 (0.01) | 0.16 (0.02) | 0.15 (0.02) |
|                           |                    | 1-MCP      | 0.21 (0.01)     | 0.21 (0.02) | 0.19 (0.01) | 0.19 (0.02) | 0.18 (0.01) | 0.18 (0.01) | 0.17 (0.02) |
| Main effects <sup>b</sup> |                    |            |                 |             |             |             |             |             |             |
| Rootstock (A)             |                    |            | ***             | ns          | ns          | ns          | ns          | ***         | ns          |
| Storage atmosphere (B)    |                    |            | ns              | ***         | **          | ***         | ***         | ***         | ***         |
| 1-MCP dose (C)            |                    |            | ns              | ns          | ns          | ***         | ***         | ***         | ***         |
| Interaction               |                    |            |                 |             |             |             |             |             |             |
| A x B                     |                    |            | ns              | ns          | ns          | ns          | ns          | ns          | *           |
| A x C                     |                    |            | ns              | ns          | ns          | **          | *           | ns          | *           |
| B x C                     |                    |            | ns              | *           | ns          | ns          | **          | ***         | ns          |
| A x B x C                 |                    |            | ns              | ns          | ns          | ns          | ns          | *           | ns          |

<sup>a</sup> Numbers in parentheses are the standard deviation of the mean (n = 10).

<sup>b</sup> P-value of F ratio: ns, not significantly different; \*P < 0.05; \*\*P < 0.01; \*\*\*P < 0.001.



**Table S9.**

Acidity of untreated (control) and 1-MCP treated 'Conference' pears analysis after storage in normal (NA) and controlled (CA) atmospheres at 2013 year

| Rootstock                 | Storage atmosphere | 1-MCP dose | Days of storage |             |             |             |             |             |             |
|---------------------------|--------------------|------------|-----------------|-------------|-------------|-------------|-------------|-------------|-------------|
|                           |                    |            | 0               | 30          | 60          | 90          | 120         | 150         | 180         |
| Q S1                      | NA                 | Control    | 0.18 (0.01)     | 0.17 (0.01) | 0.15 (0.01) | 0.13 (0.01) | 0.10 (0.02) | 0.07 (0.02) | 0.07 (0.01) |
|                           |                    | 1-MCP      | 0.18 (0.01)     | 0.18 (0.01) | 0.16 (0.01) | 0.14 (0.01) | 0.13 (0.01) | 0.12 (0.02) | 0.12 (0.02) |
|                           | KA                 | Control    | 0.18 (0.01)     | 0.18 (0.01) | 0.18 (0.01) | 0.16 (0.02) | 0.14 (0.01) | 0.13 (0.01) | 0.13 (0.01) |
|                           |                    | 1-MCP      | 0.18 (0.01)     | 0.17 (0.01) | 0.17 (0.01) | 0.16 (0.01) | 0.16 (0.01) | 0.16 (0.01) | 0.15 (0.01) |
| CP                        | NA                 | Control    | 0.18 (0.01)     | 0.19 (0.02) | 0.15 (0.01) | 0.14 (0.01) | 0.11 (0.01) | 0.08 (0.01) | 0.06 (0.02) |
|                           |                    | 1-MCP      | 0.18 (0.01)     | 0.18 (0.02) | 0.17 (0.01) | 0.15 (0.01) | 0.12 (0.02) | 0.12 (0.02) | 0.09 (0.02) |
|                           | CA                 | Control    | 0.18 (0.01)     | 0.18 (0.02) | 0.18 (0.02) | 0.16 (0.01) | 0.15 (0.01) | 0.15 (0.01) | 0.13 (0.02) |
|                           |                    | 1-MCP      | 0.18 (0.01)     | 0.18 (0.02) | 0.17 (0.01) | 0.17 (0.01) | 0.17 (0.01) | 0.16 (0.01) | 0.15 (0.01) |
| PD                        | NA                 | Control    | 0.18 (0.01)     | 0.18 (0.01) | 0.14 (0.02) | 0.13 (0.01) | 0.10 (0.02) | 0.07 (0.02) | 0.06 (0.02) |
|                           |                    | 1-MCP      | 0.18 (0.01)     | 0.17 (0.02) | 0.16 (0.01) | 0.14 (0.01) | 0.12 (0.02) | 0.12 (0.02) | 0.10 (0.02) |
|                           | CA                 | Control    | 0.18 (0.01)     | 0.18 (0.02) | 0.18 (0.02) | 0.15 (0.01) | 0.15 (0.01) | 0.14 (0.01) | 0.12 (0.01) |
|                           |                    | 1-MCP      | 0.18 (0.01)     | 0.18 (0.01) | 0.17 (0.01) | 0.17 (0.01) | 0.16 (0.01) | 0.15 (0.01) | 0.14 (0.01) |
| Main effects <sup>b</sup> |                    |            |                 |             |             |             |             |             |             |
| Rootstock (A)             |                    |            | ns              | ns          | ns          | ns          | ns          | ns          | *           |
| Storage atmosphere (B)    |                    |            | ns              | ns          | ***         | ***         | ***         | ***         | ***         |
| 1-MCP dose (C)            |                    |            | ns              | ns          | ns          | ***         | ***         | ***         | ***         |
| Interaction               |                    |            |                 |             |             |             |             |             |             |
| A x B                     |                    |            | ns              | ns          | ns          | ns          | ns          | ns          | **          |
| A x C                     |                    |            | ns              | ns          | ns          | ns          | *           | ns          | ns          |
| B x C                     |                    |            | ns              | ns          | ***         | ns          | ns          | ***         | ***         |
| A x B x C                 |                    |            | ns              | ns          | ns          | ns          | ns          | ns          | ns          |

<sup>a</sup> Numbers in parentheses are the standard deviation of the mean (n = 10).

<sup>b</sup> P-value of F ratio: ns, not significantly different; \*P < 0.05; \*\*P < 0.01; \*\*\*P < 0.001.

**Table S10.**

Impact of storage technology on the incidence of postharvest diseases and disorders in 2011

| Rootstock                 | Storage atmosphere | 1-MCP dose | ORAC $\mu$ mol<br>TE/100 g<br>(d.m.) | Brown rot  | Bitter rot | Blue mold  | Grey mold  | Internal<br>browning | Sanescent<br>Scald |
|---------------------------|--------------------|------------|--------------------------------------|------------|------------|------------|------------|----------------------|--------------------|
| Q S1                      | NA                 | Control    | 2562.50 (50.50)                      | 1.5 (0.94) | 2.9 (2.56) | 9.2 (2.81) | 1.9 (0.68) | 1.5 (0.06)           | 1.5 (0.97)         |
|                           |                    | 1-MCP      | 2782.50 (53.07)                      | 0.0 (0.00) | 0.0 (0.00) | 4.6 (1.75) | 2.7 (1.09) | 6.9 (2.10)           | 0.8 (0.71)         |
|                           | KA                 | Control    | 2817.50 (29.34)                      | 1.9 (1.64) | 0.8 (0.77) | 2.0 (0.66) | 1.9 (1.18) | 1.1 (1.16)           | 1.9 (1.61)         |
|                           |                    | 1-MCP      | 2962.50 (68.43)                      | 1.2 (0.63) | 0.7 (0.71) | 0.4 (0.58) | 0.8 (0.73) | 3.4 (0.72)           | 0.0 (0.00)         |
| CP                        | NA                 | Control    | 2562.50 (50.50)                      | 2.0 (0.75) | 3.5 (1.87) | 6.0 (0.64) | 1.9 (1.40) | 0.8 (0.80)           | 2.0 (1.77)         |
|                           |                    | 1-MCP      | 2782.50 (53.07)                      | 1.2 (1.27) | 1.2 (1.27) | 3.4 (0.81) | 1.5 (1.03) | 6.2 (0.94)           | 0.4 (0.67)         |
|                           | CA                 | Control    | 2817.50 (29.34)                      | 0.4 (0.63) | 1.5 (1.00) | 0.8 (1.26) | 1.9 (1.20) | 0.7 (0.67)           | 1.5 (1.03)         |
|                           |                    | 1-MCP      | 2962.50 (68.43)                      | 1.7 (1.28) | 1.3 (0.85) | 1.8 (0.76) | 1.8 (1.56) | 7.7 (3.07)           | 0.6 (1.03)         |
| PD                        | NA                 | Control    | 2562.50 (50.50)                      | 1.5 (1.04) | 1.4 (1.33) | 6.6 (1.42) | 1.8 (0.61) | 0.0 (0.00)           | 1.8 (1.52)         |
|                           |                    | 1-MCP      | 2782.50 (53.07)                      | 1.7 (1.08) | 0.4 (0.70) | 4.7 (1.35) | 2.6 (1.90) | 5.2 (3.25)           | 0.4 (0.68)         |
|                           | CA                 | Control    | 2817.50 (29.34)                      | 0.8 (0.71) | 1.5 (0.95) | 4.6 (2.11) | 1.9 (0.68) | 0.4 (0.67)           | 1.5 (0.96)         |
|                           |                    | 1-MCP      | 2962.50 (68.43)                      | 0.0 (0.00) | 0.0 (0.00) | 2.0 (1.29) | 1.9 (0.53) | 4.2 (1.94)           | 0.4 (0.70)         |
| Main effects <sup>b</sup> |                    |            |                                      |            |            |            |            |                      |                    |
| Rootstock (A)             |                    |            | ns                                   | ns         | **         | ***        | ns         | **                   | ns                 |
| Storage atmosphere (B)    |                    |            | ***                                  |            | **         | ***        | ns         | ns                   | ns                 |
| 1-MCP dose (C)            |                    |            | ***                                  | *          | ***        | ***        | ns         | ***                  | ***                |
| Interaction               |                    |            |                                      |            |            |            |            |                      |                    |
| A x B                     |                    |            | ns                                   | ***        | ns         | ***        | ns         | **                   | ns                 |
| A x C                     |                    |            | ns                                   | **         | ns         | **         | ns         | **                   | ns                 |
| B x C                     |                    |            | ***                                  | ns         | ***        | ***        | *          | ns                   | ns                 |
| A x B x C                 |                    |            | ns                                   | **         | **         | **         | ns         | **                   | ns                 |

<sup>a</sup> Numbers in parentheses are the standard deviation of the mean (n = 10).<sup>b</sup> P-value of F ratio: ns, not significantly different; \*P < 0.05; \*\*P < 0.01; \*\*\*P < 0.001.

**Table S11.**

Impact of storage technology on the incidence of postharvest diseases and disorders in 2012

| Rootstock | Storage atmosphere | 1-MCP dose | ORAC $\mu$ mol TE/100 g (d.m.) | Brown rot  | Bitter rot | Blue mold   | Grey mold  | Internal browning | Sanescent Scald |
|-----------|--------------------|------------|--------------------------------|------------|------------|-------------|------------|-------------------|-----------------|
| Q S1      | NA                 | Control    | 2435.00 (41.37)                | 1.6 (1.00) | 4.4 (1.10) | 9.0 (2.74)  | 3.6 (2.68) | 0.4 (0.64)        | 2.4 (0.77)      |
|           |                    | 1-MCP      | 2537.50 (21.47)                | 0.8 (0.73) | 3.8 (0.67) | 7.9 (2.19)  | 4.3 (2.63) | 4.9 (1.28)        | 1.9 (1.71)      |
|           | KA                 | Control    | 2627.50 (41.30)                | 2.6 (0.60) | 2.6 (0.60) | 4.5 (0.91)  | 1.9 (0.69) | 2.2 (0.68)        | 0.8 (0.71)      |
|           |                    | 1-MCP      | 2777.50 (54.31)                | 0.8 (0.76) | 1.2 (1.29) | 3.0 (0.92)  | 0.8 (0.74) | 6.1 (1.86)        | 1.1 (1.08)      |
| CP        | NA                 | Control    | 2435.00 (41.37)                | 3.3 (1.28) | 3.3 (1.99) | 10.7 (0.61) | 5.0 (1.27) | 1.2 (0.65)        | 3.1 (0.21)      |
|           |                    | 1-MCP      | 2537.50 (21.47)                | 1.2 (0.63) | 3.4 (1.91) | 6.8 (0.82)  | 4.1 (1.04) | 3.8 (0.73)        | 0.7 (1.20)      |
|           | CA                 | Control    | 2627.50 (41.30)                | 1.2 (1.21) | 2.8 (0.64) | 4.3 (1.23)  | 2.0 (1.23) | 1.2 (0.65)        | 2.0 (2.49)      |
|           |                    | 1-MCP      | 2777.50 (54.31)                | 0.4 (0.59) | 1.5 (1.44) | 2.2 (0.78)  | 1.1 (1.21) | 5.4 (0.86)        | 1.1 (0.60)      |
| PD        | NA                 | Control    | 2435.00 (41.37)                | 0.9 (0.84) | 4.9 (1.09) | 9.9 (2.36)  | 6.5 (1.60) | 0.8 (1.32)        | 4.0 (2.16)      |
|           |                    | 1-MCP      | 2537.50 (21.47)                | 0.7 (0.70) | 3.4 (0.64) | 7.8 (1.78)  | 6.4 (1.28) | 3.4 (1.23)        | 0.4 (0.63)      |
|           | CA                 | Control    | 2627.50 (41.30)                | 1.2 (1.27) | 2.6 (1.21) | 3.4 (0.45)  | 2.3 (1.58) | 2.7 (1.19)        | 1.8 (1.11)      |
|           |                    | 1-MCP      | 2777.50 (54.31)                | 0.4 (0.70) | 0.8 (0.78) | 2.5 (1.45)  | 1.3 (1.34) | 5.8 (0.85)        | 2.9 (1.41)      |

**Main effects<sup>b</sup>**

|                        |     |     |     |     |     |     |     |
|------------------------|-----|-----|-----|-----|-----|-----|-----|
| Rootstock (A)          | ns  | *** | ns  | ns  | *** | ns  | *   |
| Storage atmosphere (B) | *** | ns  | *** | *** | *** | *** | ns  |
| 1-MCP dose (C)         | *** | *** | *** | *** | ns  | *** | *** |

**Interaction**

|           |    |     |    |    |    |    |     |
|-----------|----|-----|----|----|----|----|-----|
| A x B     | ns | *** | ns | ns | ** | *  | ns  |
| A x C     | ns | *   | ns | *  | ns | *  | *   |
| B x C     | ** | ns  | ns | ns | ns | ns | *** |
| A x B x C | ns | **  | ns | ns | ns | *  | **  |

<sup>a</sup> Numbers in parentheses are the standard deviation of the mean (n = 10).<sup>b</sup> P-value of F ratio: ns, not significantly different; \*P < 0.05; \*\*P < 0.01; \*\*\*P < 0.001.

**Table S12.**

Impact of storage technology on the incidence of postharvest diseases and disorders in 2013

| Rootstock | Storage atmosphere | 1-MCP dose | ORAC $\mu$ mol TE/100 g (d.m.) | Brown rot  | Bitter rot | Blue mold   | Grey mold  | Internal browning | Sanescent Scald |
|-----------|--------------------|------------|--------------------------------|------------|------------|-------------|------------|-------------------|-----------------|
| Q S1      | NA                 | Control    | 2750 (64.29)                   | 2.1 (0.63) | 8.5 (2.23) | 7.5 (0.42)  | 4.7 (1.47) | 0.4 (0.58)        | 2.5 (1.48)      |
|           |                    | 1-MCP      | 2847 (79.02)                   | 3.2 (1.10) | 3.9 (0.61) | 4.7 (0.82)  | 2.8 (0.14) | 13.1 (0.85)       | 0.7 (1.10)      |
|           | KA                 | Control    | 2990 (34.64)                   | 1.9 (0.66) | 5.5 (0.66) | 5.1 (3.40)  | 2.6 (1.17) | 1.1 (0.60)        | 1.1 (1.20)      |
|           |                    | 1-MCP      | 3107 (20.41)                   | 1.8 (0.56) | 0.0 (0.00) | 3.6 (1.21)  | 2.5 (0.64) | 5.4 (0.68)        | 1.1 (0.59)      |
| CP        | NA                 | Control    | 2750 (64.29)                   | 3.2 (1.05) | 8.8 (2.27) | 10.4 (0.61) | 7.7 (1.90) | 0.0 (0.00)        | 2.4 (1.70)      |
|           |                    | 1-MCP      | 2912 (16.83)                   | 1.9 (0.71) | 3.4 (0.57) | 6.9 (1.82)  | 3.0 (1.44) | 11.8 (1.75)       | 2.3 (1.24)      |
|           | CA                 | Control    | 2990 (34.64)                   | 1.6 (1.06) | 6.4 (0.44) | 3.4 (2.19)  | 2.7 (0.67) | 1.8 (1.79)        | 1.1 (1.15)      |
|           |                    | 1-MCP      | 3107 (20.41)                   | 1.9 (0.53) | 0.8 (0.71) | 3.9 (0.89)  | 1.5 (0.96) | 4.7 (2.08)        | 2.0 (1.25)      |
| PD        | NA                 | Control    | 2750 (64.29)                   | 2.7 (0.64) | 7.0 (1.60) | 10.6 (2.30) | 6.2 (2.11) | 0.4 (0.63)        | 2.4 (1.65)      |
|           |                    | 1-MCP      | 2912 (16.83)                   | 2.8 (0.60) | 4.1 (1.49) | 7.2 (1.70)  | 3.2 (1.13) | 12.0 (0.95)       | 1.2 (1.29)      |
|           | CA                 | Control    | 2990 (34.64)                   | 2.4 (1.53) | 5.6 (1.27) | 5.5 (3.47)  | 2.6 (0.49) | 1.1 (0.62)        | 2.2 (0.52)      |
|           |                    | 1-MCP      | 3107 (20.41)                   | 2.0 (0.71) | 1.2 (0.63) | 2.4 (0.75)  | 1.6 (0.05) | 6.3 (1.12)        | 1.6 (1.51)      |

**Main effects<sup>b</sup>**

|                        |     |     |     |     |     |     |    |
|------------------------|-----|-----|-----|-----|-----|-----|----|
| Rootstock (A)          | ns  | ns  | ns  | *   | ns  | ns  | ns |
| Storage atmosphere (B) | *** | *** | *** | *** | *** | *** | ns |
| 1-MCP dose (C)         | *** | ns  | *** | *** | *** | *** | *  |

**Interaction**

|           |    |    |    |     |     |     |    |
|-----------|----|----|----|-----|-----|-----|----|
| A x B     | ns | ns | ns | *** | **  | ns  | ns |
| A x C     | ns | *  | ** |     | **  | *   | *  |
| B x C     | ns | ns | ns | *   | *** | *** | *  |
| A x B x C | ns | ** | ns | ns  | ns  | *   | ns |

<sup>a</sup> Numbers in parentheses are the standard deviation of the mean (n = 10).<sup>b</sup> P-value of F ratio: ns, not significantly different; \*P < 0.05; \*\*P < 0.01; \*\*\*P < 0.001.
